# Supplementary material for: Combining a hip arthroplasty stem with trochanteric reattachment bolt and a polyaxial locking plate in the treatment of a periprosthetic fracture below a well-integrated implant
Source: PubMed Central journal article supplement — Arthroplast Today. 2016 Mar 2;2(4):141–5. doi: 10.1016/j.artd.2016.02.002 (PMC5247515; doi:10.1016/j.artd.2016.02.002), 2016-03-02
Supplement: mmc1.pdf [file mmc1.pdf]

# CONFLICT OF INTEREST STATEMENT

## *Arthroplasty Today*

(Adopted from the American Academy of Orthopaedic Surgeons disclosure statement)

The following form **must be filled out completely and submitted by each author (example, 6 authors, 6 forms)**. **If no discloser is required, please write/type "none" at the end of each sentence.**

Manuscript Title

1. Royalties from a company or supplier (The following conflicts were disclosed)

NONE

2. Speakers bureau/paid presentations for a company or supplier (The following conflicts were disclosed)

BIOMET, SMITH & NEPHEW

3A. Paid employee for a company or supplier (The following conflicts were disclosed)

NONE

3B. Paid consultant for a company or supplier (The following conflicts were disclosed)

NONE

3C. Unpaid consultants for a company or supplier (The following conflicts were disclosed)

NONE

4. Stock or stock options in a company or supplier (The following conflicts were disclosed)

NONE

5. Research support from a company or supplier as a Principal Investigator (The following conflicts were disclosed)

BIOMET

6. Other financial or material support from a company or supplier (The following conflicts were disclosed)

NONE

7. Royalties, financial or material support from publishers (The following conflicts were disclosed)

NONE

8. Medical/Orthopaedic publications editorial/governing board (The following conflicts were disclosed)

NONE

9. Board member/committee appointments for a society (The following conflicts were disclosed)

NONE

**Each author must sign AND print or type his/her name, date and submit a separate form**

In addition, one BLINDED Conflict of Interest form (no author names used) should be submitted per manuscript with all author disclosures.



2016-JAN-20

Author Name (Print or Type)

Author Signature

Date

# CONFLICT OF INTEREST STATEMENT

## *Arthroplasty Today*

(Adopted from the American Academy of Orthopaedic Surgeons disclosure statement)

The following form **must be filled out completely and submitted by each author (example, 6 authors, 6 forms). If no discloser is required, please write/type "none" at the end of each sentence.**

Manuscript Title

1. Royalties from a company or supplier (The following conflicts were disclosed)  
NONE
2. Speakers bureau/paid presentations for a company or supplier (The following conflicts were disclosed)  
NONE
- 3A. Paid employee for a company or supplier (The following conflicts were disclosed)  
NONE
- 3B. Paid consultant for a company or supplier (The following conflicts were disclosed)  
NONE
- 3C. Unpaid consultants for a company or supplier (The following conflicts were disclosed)  
NONE
4. Stock or stock options in a company or supplier (The following conflicts were disclosed)  
NONE
5. Research support from a company or supplier as a Principal Investigator (The following conflicts were disclosed)  
NONE
6. Other financial or material support from a company or supplier (The following conflicts were disclosed)  
NONE
7. Royalties, financial or material support from publishers (The following conflicts were disclosed)  
NONE
8. Medical/Orthopaedic publications editorial/governing board (The following conflicts were disclosed)  
NONE
9. Board member/committee appointments for a society (The following conflicts were disclosed)  
NONE

**Each author must sign AND print or type his/her name, date and submit a separate form**

In addition, one BLINDED Conflict of Interest form (no author names used) should be submitted per manuscript with all author disclosures.

Lois Kravsson Jassak ~ 2016-7-20  
Author Name (Print or Type) Author Signature Date
